# Supplementary material for: Improvements in the Modeling and Kinetics Processes of the Enzymatic Synthesis of Pentyl Acetate
Source: MDPI journal article supplement (doi:10.3390/pr11061640), 2023-05-26
Supplement: s1 [file s1]

# Supplementary Material

## Improvements in the modeling and kinetics processes of the enzymatic synthesis of pentyl acetate

Beatriz Lorenzo, Luis Fernández, Juan Ortega,\* and Leandro Domínguez

Division of Thermal Engineering & Instrumentation (IDeTIC). Universidad de Las Palmas de Gran Canaria,  
35017 Las Palmas de Gran Canaria, Spain  
\* Correspondence: juan.ortega@ulpgc.es

**Table S1.** Experimental physical properties measured at 298.15 K for the compounds used in this work.

| Compound       | CAS No.  | Purity<br>(w/w%) | $\rho/\text{kg}\cdot\text{m}^{-3}$ |                      | $n_D$  |                      |
|----------------|----------|------------------|------------------------------------|----------------------|--------|----------------------|
|                |          |                  | exp.                               | lit.                 | exp.   | lit.                 |
| pentan-1-ol    | 71-41-0  | >99.0            | 810.92                             | 811.50 <sup>a</sup>  | 1.4060 | 1.4079 <sup>a</sup>  |
|                |          |                  |                                    | 810.97 <sup>b</sup>  |        | 1.4077 <sup>b</sup>  |
| acetic acid    | 64-19-7  | >99.5            | 1043.61                            | 1043.66 <sup>a</sup> | 1.3690 | 1.3698 <sup>a</sup>  |
|                |          |                  |                                    | 1043.95 <sup>c</sup> |        | 1.36969 <sup>c</sup> |
| pentyl acetate | 628-63-7 | >99.0            | 872.08                             | 871.9 <sup>a,e</sup> | 1.3990 | 1.4000 <sup>d</sup>  |
|                |          |                  |                                    | 872.19 <sup>d</sup>  |        |                      |
| hexane         | 110-54-3 | >99.0            | 654.78                             | 654.81 <sup>a</sup>  | 1.3725 | 1.37226 <sup>a</sup> |
|                |          |                  |                                    | 654.82 <sup>b</sup>  |        | 1.3725 <sup>b</sup>  |

<sup>a</sup>[28]; <sup>b</sup>[29]; <sup>c</sup>[30]; <sup>d</sup>[31]; <sup>e</sup>[32]

**Table S2.** Parametrization obtained for Equation (1), and RMSE by Equation (2).

| $k'_1$                  | $k'_2$               | $k'_3$                  | $k'_4$                  | $k'_5$               | $k'_6$                  |
|-------------------------|----------------------|-------------------------|-------------------------|----------------------|-------------------------|
| 1.0780                  | 1.0000               | $3.4244 \times 10^{-2}$ | $9.0632 \times 10^2$    | $2.2982 \times 10^1$ | $1.9031 \times 10^{-6}$ |
| $k'_7$                  | $k'_8$               | $k'_9$                  | $k'_{10}$               | RMSE, Equation (2)   |                         |
| $4.3542 \times 10^{-2}$ | $7.5048 \times 10^1$ | 7.5343                  | $9.6127 \times 10^{-1}$ | 0.067                |                         |

**Table S3.** Parameters used for the calculation of mass transfer effectiveness factors

| Constant parameters                                   |                        |                                                          |                                                                                                 |                                   |                                                            |                                                               |                                                          |                                                                        |                        |                           |                        |                           |
|-------------------------------------------------------|------------------------|----------------------------------------------------------|-------------------------------------------------------------------------------------------------|-----------------------------------|------------------------------------------------------------|---------------------------------------------------------------|----------------------------------------------------------|------------------------------------------------------------------------|------------------------|---------------------------|------------------------|---------------------------|
| $d_p / \mu\text{m}$                                   | 452                    | $V_{\text{acid}} / \text{cm}^3 \cdot \text{mol}^{-1}$    |                                                                                                 | 63.93                             | $M_{\text{acid}} / \text{g} \cdot \text{mol}^{-1}$         |                                                               | 60.05                                                    | $\mu_{\text{acid}} / \text{cP}$                                        |                        | 0.9036                    |                        |                           |
| $a / \text{cm}^{-1}$                                  | 132.626                | $V_{\text{alcohol}} / \text{cm}^3 \cdot \text{mol}^{-1}$ |                                                                                                 | 123.53                            | $M_{\text{alcohol}} / \text{g} \cdot \text{mol}^{-1}$      |                                                               | 88.15                                                    | $\mu_{\text{alcohol}} / \text{cP}$                                     |                        | 2.2966                    |                        |                           |
| <b>Sh</b>                                             | 2                      | $\varphi_{\text{acid}}$                                  |                                                                                                 | 1.62                              | $M_{\text{hexane}} / \text{g} \cdot \text{mol}^{-1}$       |                                                               | 86.18                                                    | $D_{\text{acid,alcohol}}^{\text{o}} / \text{cm}^2 \cdot \text{s}^{-1}$ |                        | $7.82 \times 10^{-6}$     |                        |                           |
| $\varepsilon_{\text{p}}$                              | 0.5                    | $\varphi_{\text{alcohol}}$                               |                                                                                                 | 1.00                              | $T / \text{K}$                                             |                                                               | 313.15                                                   | $D_{\text{alcohol,acid}}^{\text{o}} / \text{cm}^2 \cdot \text{s}^{-1}$ |                        | $1.41 \times 10^{-5}$     |                        |                           |
| $\tau_{\text{p}}$                                     | 6                      | $\varphi_{\text{hexane}}$                                |                                                                                                 | 1.00                              |                                                            |                                                               |                                                          |                                                                        |                        |                           |                        |                           |
| Changing parameters related to external mass transfer |                        |                                                          |                                                                                                 |                                   |                                                            |                                                               |                                                          |                                                                        |                        |                           |                        |                           |
| Exp.                                                  | $\chi_{0,\text{acid}}$ | $\chi_{0,\text{alcohol}}$                                | $r_{0,\text{obs}} /$<br>$\text{mol} \cdot \text{mol}_{\text{total}}^{-1} \cdot \text{min}^{-1}$ | $\mu_{\text{m}} /$<br>$\text{cP}$ | $D_{\text{acid},m} /$<br>$\text{cm}^2 \cdot \text{s}^{-1}$ | $D_{\text{alcohol},m} /$<br>$\text{cm}^2 \cdot \text{s}^{-1}$ | $k_{\text{L,acid}} /$<br>$\text{cm} \cdot \text{s}^{-1}$ | $k_{\text{L,alcohol}} /$<br>$\text{cm} \cdot \text{s}^{-1}$            | $Da_{\text{obs,acid}}$ | $Da_{\text{obs,alcohol}}$ | $\eta_{\text{E,acid}}$ | $\eta_{\text{E,alcohol}}$ |
| 1                                                     | 0.10                   | 0.10                                                     | $3.265 \times 10^{-4}$                                                                          | 0.3628                            | $4.93 \times 10^{-5}$                                      | $3.32 \times 10^{-5}$                                         | $2.18 \times 10^{-3}$                                    | $1.47 \times 10^{-3}$                                                  | $1.88 \times 10^{-4}$  | $2.80 \times 10^{-4}$     | 0.999                  | 0.999                     |
| 2                                                     | 0.14                   | 0.14                                                     | $2.442 \times 10^{-4}$                                                                          | 0.4165                            | $4.31 \times 10^{-5}$                                      | $2.90 \times 10^{-5}$                                         | $1.90 \times 10^{-3}$                                    | $1.28 \times 10^{-3}$                                                  | $1.15 \times 10^{-4}$  | $1.71 \times 10^{-4}$     | 0.999                  | 0.999                     |
| 3                                                     | 0.18                   | 0.18                                                     | $5.388 \times 10^{-4}$                                                                          | 0.4780                            | $3.76 \times 10^{-5}$                                      | $2.54 \times 10^{-5}$                                         | $1.66 \times 10^{-3}$                                    | $1.12 \times 10^{-3}$                                                  | $2.26 \times 10^{-4}$  | $3.36 \times 10^{-4}$     | 0.999                  | 0.999                     |
| 4                                                     | 0.25                   | 0.25                                                     | $1.143 \times 10^{-3}$                                                                          | 0.6085                            | $2.97 \times 10^{-5}$                                      | $2.00 \times 10^{-5}$                                         | $1.31 \times 10^{-3}$                                    | $8.85 \times 10^{-4}$                                                  | $4.37 \times 10^{-4}$  | $6.49 \times 10^{-4}$     | 0.999                  | 0.999                     |
| 5                                                     | 0.50                   | 0.50                                                     | $2.101 \times 10^{-4}$                                                                          | 1.4405                            | $1.05 \times 10^{-5}$                                      | $1.05 \times 10^{-5}$                                         | $4.63 \times 10^{-4}$                                    | $4.63 \times 10^{-4}$                                                  | $1.14 \times 10^{-4}$  | $1.14 \times 10^{-4}$     | 0.999                  | 0.999                     |
| 6                                                     | 0.10                   | 0.20                                                     | $8.219 \times 10^{-4}$                                                                          | 0.4517                            | $3.96 \times 10^{-5}$                                      | $2.67 \times 10^{-5}$                                         | $1.75 \times 10^{-3}$                                    | $1.18 \times 10^{-3}$                                                  | $5.89 \times 10^{-4}$  | $4.37 \times 10^{-4}$     | 0.999                  | 0.999                     |
| 7                                                     | 0.14                   | 0.28                                                     | $1.107 \times 10^{-3}$                                                                          | 0.5659                            | $3.17 \times 10^{-5}$                                      | $2.14 \times 10^{-5}$                                         | $1.40 \times 10^{-3}$                                    | $9.45 \times 10^{-4}$                                                  | $7.08 \times 10^{-4}$  | $5.25 \times 10^{-4}$     | 0.998                  | 0.999                     |
| 8                                                     | 0.18                   | 0.36                                                     | $1.178 \times 10^{-3}$                                                                          | 0.7090                            | $2.54 \times 10^{-5}$                                      | $1.71 \times 10^{-5}$                                         | $1.12 \times 10^{-3}$                                    | $7.57 \times 10^{-4}$                                                  | $7.32 \times 10^{-4}$  | $5.43 \times 10^{-4}$     | 0.998                  | 0.999                     |
| 9                                                     | 0.25                   | 0.50                                                     | $1.466 \times 10^{-3}$                                                                          | 1.0520                            | $1.72 \times 10^{-5}$                                      | $1.16 \times 10^{-5}$                                         | $7.62 \times 10^{-4}$                                    | $5.13 \times 10^{-4}$                                                  | $9.67 \times 10^{-4}$  | $7.18 \times 10^{-4}$     | 0.998                  | 0.998                     |
| 10                                                    | 0.33                   | 0.67                                                     | $1.019 \times 10^{-3}$                                                                          | 1.6828                            | $9.51 \times 10^{-6}$                                      | $9.51 \times 10^{-6}$                                         | $4.20 \times 10^{-4}$                                    | $4.20 \times 10^{-4}$                                                  | $9.14 \times 10^{-4}$  | $4.57 \times 10^{-4}$     | 0.998                  | 0.999                     |
| 11                                                    | 0.10                   | 0.30                                                     | $5.872 \times 10^{-4}$                                                                          | 0.5622                            | $3.19 \times 10^{-5}$                                      | $2.15 \times 10^{-5}$                                         | $1.41 \times 10^{-3}$                                    | $9.49 \times 10^{-4}$                                                  | $5.23 \times 10^{-4}$  | $2.59 \times 10^{-4}$     | 0.999                  | 0.999                     |
| 12                                                    | 0.14                   | 0.42                                                     | $7.872 \times 10^{-4}$                                                                          | 0.7689                            | $2.34 \times 10^{-5}$                                      | $1.58 \times 10^{-5}$                                         | $1.03 \times 10^{-3}$                                    | $6.97 \times 10^{-4}$                                                  | $6.83 \times 10^{-4}$  | $3.38 \times 10^{-4}$     | 0.999                  | 0.999                     |
| 13                                                    | 0.18                   | 0.54                                                     | $9.397 \times 10^{-4}$                                                                          | 1.0516                            | $1.72 \times 10^{-5}$                                      | $1.16 \times 10^{-5}$                                         | $7.59 \times 10^{-4}$                                    | $5.12 \times 10^{-4}$                                                  | $8.64 \times 10^{-4}$  | $4.28 \times 10^{-4}$     | 0.998                  | 0.999                     |
| 14                                                    | 0.25                   | 0.75                                                     | $7.747 \times 10^{-4}$                                                                          | 1.8189                            | $9.05 \times 10^{-6}$                                      | $9.05 \times 10^{-6}$                                         | $4.00 \times 10^{-4}$                                    | $4.00 \times 10^{-4}$                                                  | $9.73 \times 10^{-4}$  | $3.24 \times 10^{-4}$     | 0.998                  | 0.999                     |

Table S3. (continued)

| Changing parameters related to internal mass transfer |                     |                        |                                                                                                 |                                                            |                                                               |                                                              |                                                                 |                          |                             |                       |                         |                        |                           |
|-------------------------------------------------------|---------------------|------------------------|-------------------------------------------------------------------------------------------------|------------------------------------------------------------|---------------------------------------------------------------|--------------------------------------------------------------|-----------------------------------------------------------------|--------------------------|-----------------------------|-----------------------|-------------------------|------------------------|---------------------------|
| Exp.                                                  | $x_{0,\text{acid}}$ | $x_{0,\text{alcohol}}$ | $r_{0,\text{obs}} /$<br>$\text{mol} \cdot \text{mol}_{\text{total}}^{-1} \cdot \text{min}^{-1}$ | $D_{\text{acid},m} /$<br>$\text{cm}^2 \cdot \text{s}^{-1}$ | $D_{\text{alcohol},m} /$<br>$\text{cm}^2 \cdot \text{s}^{-1}$ | $D_{\text{eff,acid}} /$<br>$\text{cm}^2 \cdot \text{s}^{-1}$ | $D_{\text{eff,alcohol}} /$<br>$\text{cm}^2 \cdot \text{s}^{-1}$ | $\Phi_{\text{obs,acid}}$ | $\Phi_{\text{obs,alcohol}}$ | $\phi_{\text{acid}}$  | $\phi_{\text{alcohol}}$ | $\eta_{\text{I,acid}}$ | $\eta_{\text{I,alcohol}}$ |
| 1                                                     | 0.10                | 0.10                   | $3.265 \times 10^{-4}$                                                                          | $4.93 \times 10^{-5}$                                      | $3.32 \times 10^{-5}$                                         | $4.11 \times 10^{-6}$                                        | $2.77 \times 10^{-6}$                                           | $7.53 \times 10^{-4}$    | $1.12 \times 10^{-3}$       | $2.74 \times 10^{-2}$ | $3.34 \times 10^{-2}$   | 0.999                  | 0.999                     |
| 2                                                     | 0.14                | 0.14                   | $2.442 \times 10^{-4}$                                                                          | $4.31 \times 10^{-5}$                                      | $2.90 \times 10^{-5}$                                         | $3.59 \times 10^{-6}$                                        | $2.42 \times 10^{-6}$                                           | $4.60 \times 10^{-4}$    | $6.84 \times 10^{-4}$       | $2.14 \times 10^{-2}$ | $2.62 \times 10^{-2}$   | 0.999                  | 0.999                     |
| 3                                                     | 0.18                | 0.18                   | $5.388 \times 10^{-4}$                                                                          | $3.76 \times 10^{-5}$                                      | $2.54 \times 10^{-5}$                                         | $3.14 \times 10^{-6}$                                        | $2.11 \times 10^{-6}$                                           | $9.04 \times 10^{-4}$    | $1.34 \times 10^{-3}$       | $3.01 \times 10^{-2}$ | $3.67 \times 10^{-2}$   | 0.999                  | 0.999                     |
| 4                                                     | 0.25                | 0.25                   | $1.143 \times 10^{-3}$                                                                          | $2.97 \times 10^{-5}$                                      | $2.00 \times 10^{-5}$                                         | $2.48 \times 10^{-6}$                                        | $1.67 \times 10^{-6}$                                           | $1.75 \times 10^{-3}$    | $2.60 \times 10^{-3}$       | $4.18 \times 10^{-2}$ | $5.10 \times 10^{-2}$   | 0.999                  | 0.998                     |
| 5                                                     | 0.50                | 0.50                   | $2.101 \times 10^{-4}$                                                                          | $1.05 \times 10^{-5}$                                      | $1.05 \times 10^{-5}$                                         | $8.74 \times 10^{-7}$                                        | $8.74 \times 10^{-7}$                                           | $4.56 \times 10^{-4}$    | $4.56 \times 10^{-4}$       | $2.14 \times 10^{-2}$ | $2.14 \times 10^{-2}$   | 0.999                  | 0.999                     |
| 6                                                     | 0.10                | 0.20                   | $8.219 \times 10^{-4}$                                                                          | $3.96 \times 10^{-5}$                                      | $2.67 \times 10^{-5}$                                         | $3.30 \times 10^{-6}$                                        | $2.23 \times 10^{-6}$                                           | $2.36 \times 10^{-3}$    | $1.75 \times 10^{-3}$       | $4.86 \times 10^{-2}$ | $4.19 \times 10^{-2}$   | 0.998                  | 0.999                     |
| 7                                                     | 0.14                | 0.28                   | $1.107 \times 10^{-3}$                                                                          | $3.17 \times 10^{-5}$                                      | $2.14 \times 10^{-5}$                                         | $2.65 \times 10^{-6}$                                        | $1.78 \times 10^{-6}$                                           | $2.83 \times 10^{-3}$    | $2.10 \times 10^{-3}$       | $5.33 \times 10^{-2}$ | $4.59 \times 10^{-2}$   | 0.998                  | 0.999                     |
| 8                                                     | 0.18                | 0.36                   | $1.178 \times 10^{-3}$                                                                          | $2.54 \times 10^{-5}$                                      | $1.71 \times 10^{-5}$                                         | $2.12 \times 10^{-6}$                                        | $1.43 \times 10^{-6}$                                           | $2.93 \times 10^{-3}$    | $2.17 \times 10^{-3}$       | $5.41 \times 10^{-2}$ | $4.66 \times 10^{-2}$   | 0.998                  | 0.999                     |
| 9                                                     | 0.25                | 0.50                   | $1.466 \times 10^{-3}$                                                                          | $1.72 \times 10^{-5}$                                      | $1.16 \times 10^{-5}$                                         | $1.44 \times 10^{-6}$                                        | $9.68 \times 10^{-7}$                                           | $3.87 \times 10^{-3}$    | $2.87 \times 10^{-3}$       | $6.23 \times 10^{-2}$ | $5.36 \times 10^{-2}$   | 0.998                  | 0.998                     |
| 10                                                    | 0.33                | 0.67                   | $1.019 \times 10^{-3}$                                                                          | $9.51 \times 10^{-6}$                                      | $9.51 \times 10^{-6}$                                         | $7.92 \times 10^{-7}$                                        | $7.92 \times 10^{-7}$                                           | $3.66 \times 10^{-3}$    | $1.83 \times 10^{-3}$       | $6.05 \times 10^{-2}$ | $4.28 \times 10^{-2}$   | 0.998                  | 0.999                     |
| 11                                                    | 0.10                | 0.30                   | $5.872 \times 10^{-4}$                                                                          | $3.19 \times 10^{-5}$                                      | $2.15 \times 10^{-5}$                                         | $2.66 \times 10^{-6}$                                        | $1.79 \times 10^{-6}$                                           | $2.09 \times 10^{-3}$    | $1.04 \times 10^{-3}$       | $4.58 \times 10^{-2}$ | $3.22 \times 10^{-2}$   | 0.999                  | 0.999                     |
| 12                                                    | 0.14                | 0.42                   | $7.872 \times 10^{-4}$                                                                          | $2.34 \times 10^{-5}$                                      | $1.58 \times 10^{-5}$                                         | $1.95 \times 10^{-6}$                                        | $1.31 \times 10^{-6}$                                           | $2.73 \times 10^{-3}$    | $1.35 \times 10^{-3}$       | $5.23 \times 10^{-2}$ | $3.68 \times 10^{-2}$   | 0.998                  | 0.999                     |
| 13                                                    | 0.18                | 0.54                   | $9.397 \times 10^{-4}$                                                                          | $1.72 \times 10^{-5}$                                      | $1.16 \times 10^{-5}$                                         | $1.43 \times 10^{-6}$                                        | $9.64 \times 10^{-7}$                                           | $3.46 \times 10^{-3}$    | $1.71 \times 10^{-3}$       | $5.88 \times 10^{-2}$ | $4.14 \times 10^{-2}$   | 0.998                  | 0.999                     |
| 14                                                    | 0.25                | 0.75                   | $7.747 \times 10^{-4}$                                                                          | $9.05 \times 10^{-6}$                                      | $9.05 \times 10^{-6}$                                         | $7.54 \times 10^{-7}$                                        | $7.54 \times 10^{-7}$                                           | $3.89 \times 10^{-3}$    | $1.30 \times 10^{-3}$       | $6.25 \times 10^{-2}$ | $3.60 \times 10^{-2}$   | 0.997                  | 0.999                     |

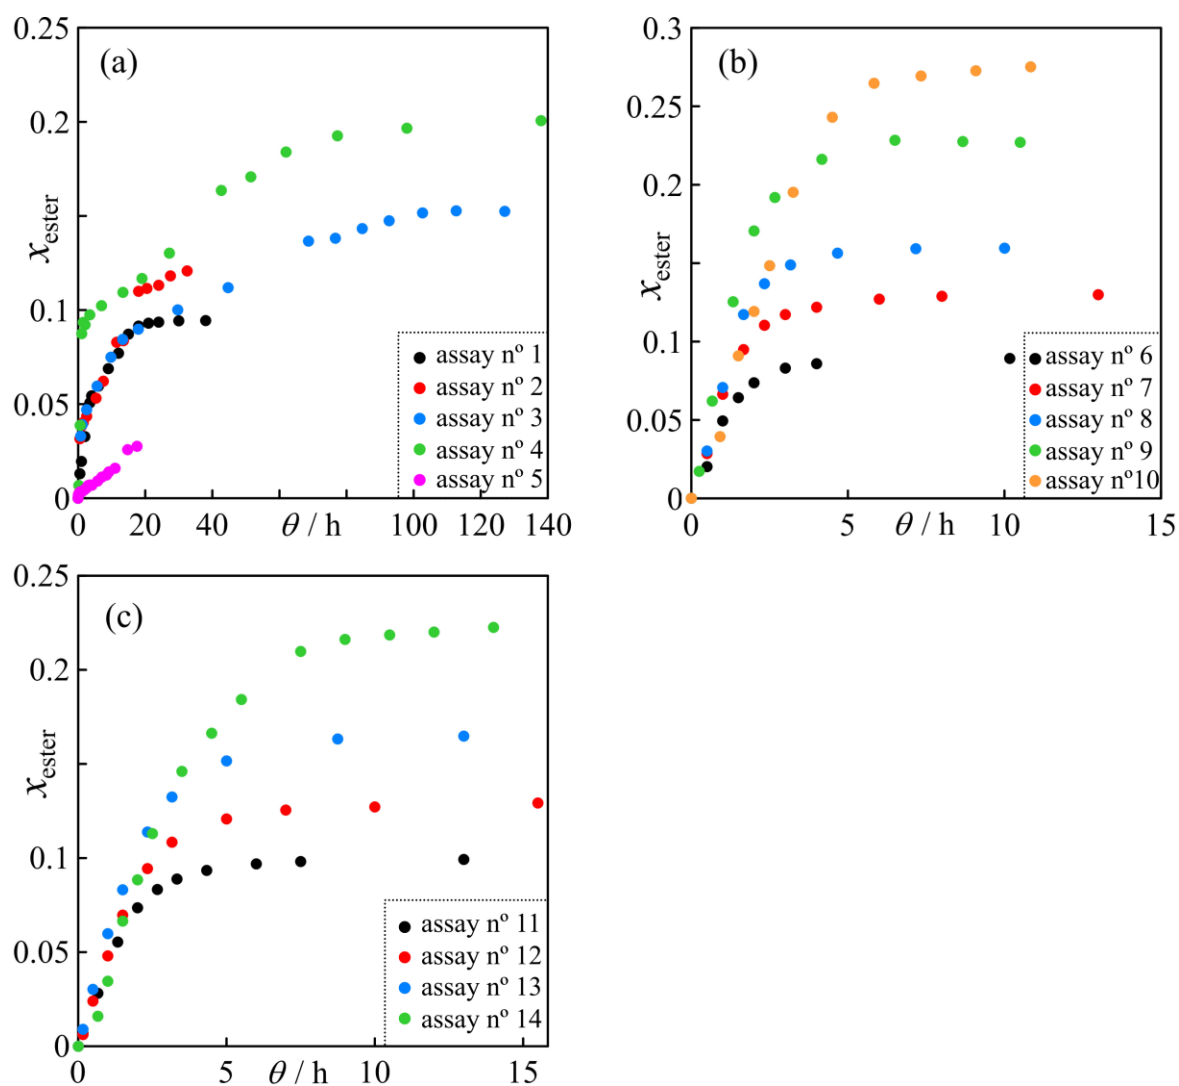

**Figure S1.** Plots of ester molar fraction *vs*  $\theta$ -time. Effect of acetic acid initial molar fractions on reaction kinetics at several alcohol/acid molar ratio: (a)  $X_{0,\text{alcohol}}/X_{0,\text{acid}}=1$ ; (b)  $X_{0,\text{alcohol}}/X_{0,\text{acid}}=2$ ; (c)  $X_{0,\text{alcohol}}/X_{0,\text{acid}}=3$ .

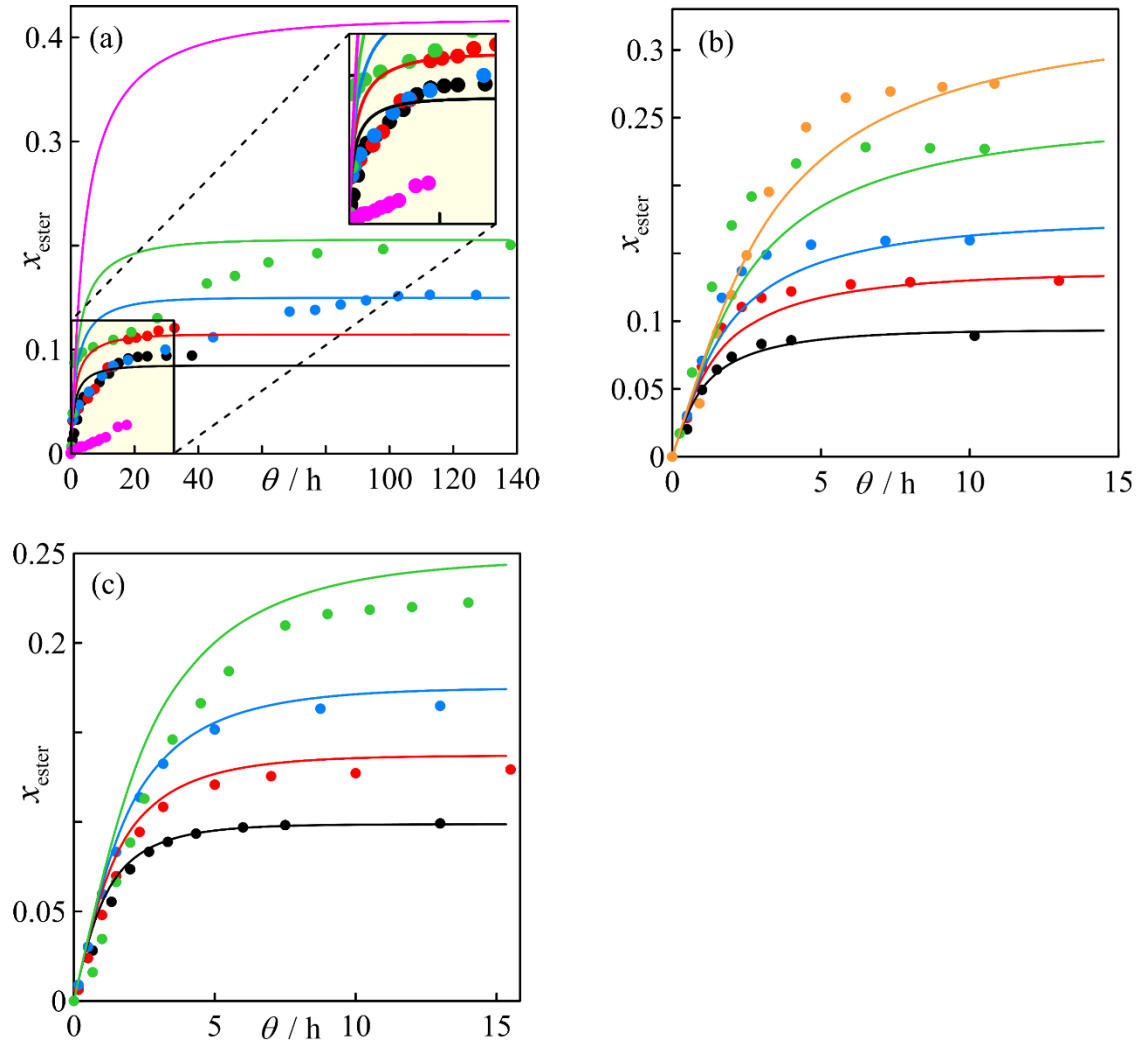

**Figure S2.** Experimental results and modeling according to the ratios  $x_{0,\text{alcohol}}/x_{0,\text{acid}}$ , and for different  $x_{0,\text{acid}}$  values: (a)  $x_{0,\text{alcohol}}/x_{0,\text{acid}}=1$ ; (b)  $x_{0,\text{alcohol}}/x_{0,\text{acid}}=2$ ; (c)  $x_{0,\text{alcohol}}/x_{0,\text{acid}}=3$ . (●) 0.10; (●) 0.14; (●) 0.18; (●) 0.25; (●) 0.33; (●) 0.50. The coloured-lines correspond to the representation by modeling using Equation (1).

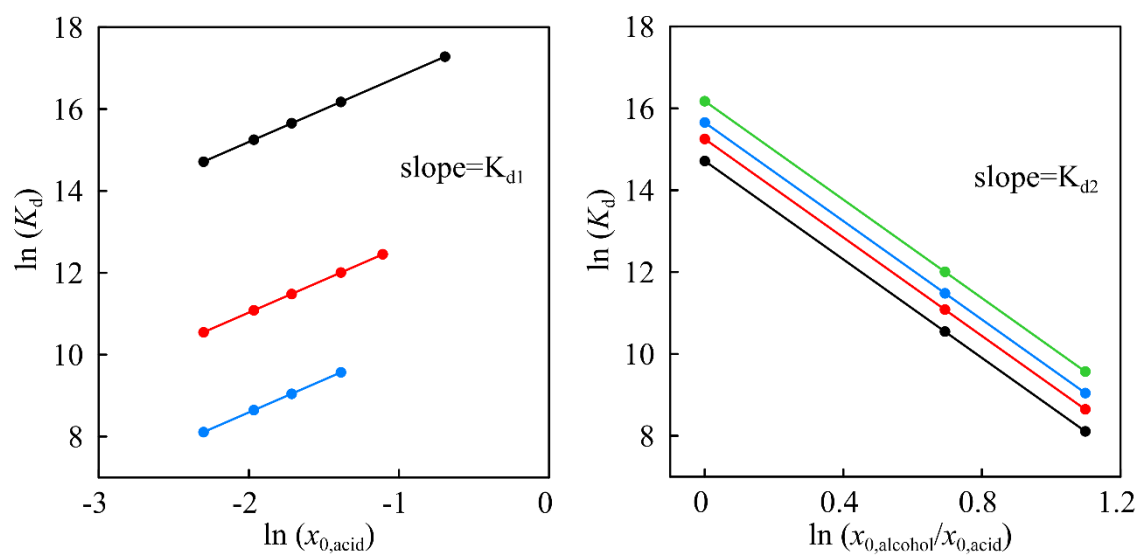

**Figure S3.** Graphical representation of the empirical correlation Equation (4).
